# Supplementary material
Source: Springer Nature journal article supplement (https://www.springermedizin.de/resource/supplementary/13012_2013_670_MOESM3_ESM.pdf/9630494)

### Additional File 3: Reference screening by pertinence

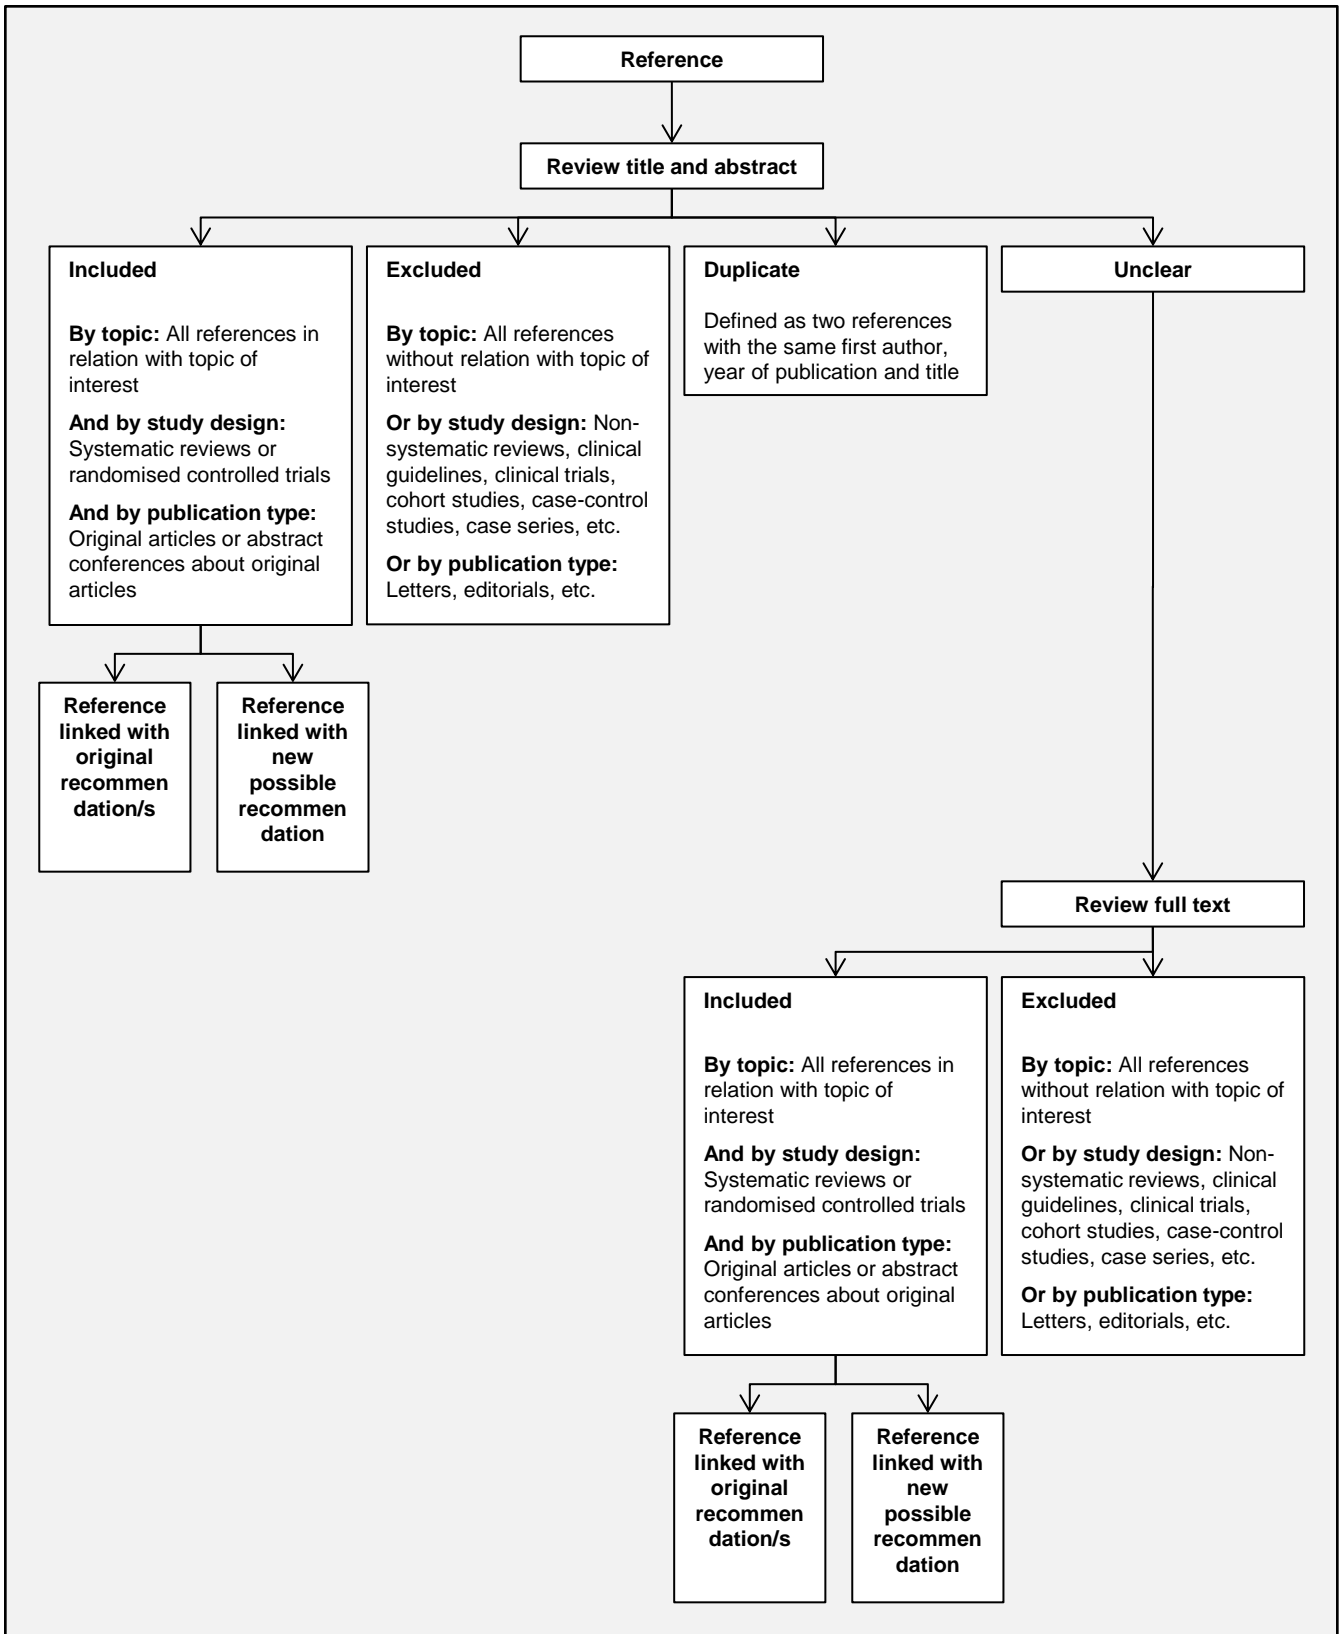

Supplement: MOESM3 [file 9630494]
